# Supplementary material for: A solid electrolyte interphase to protect the sulfurized polyacrylonitrile (SPAN) composite for Li–S batteries: computational approach addressing the electrolyte/SPAN interfacial reactivity
Source: Royal Society of Chemistry journal article supplement (doi:10.1039/d1ta00110h), 2021-01-01
Supplement: d1ta00110h1.pdf [file d1ta00110h1.pdf]

# A Solid Electrolyte Interphase to Protect the Sulfurized Polyacrylonitrile (SPAN) Composite for Li-S Batteries: Computational Approach Addressing the Electrolyte/SPAN Interfacial Reactivity

Saul Perez Beltran<sup>1</sup>, and Perla B. Balbuena<sup>1,2,3,\*</sup>

<sup>1</sup>Department of Chemical Engineering, <sup>2</sup>Department of Materials Science and Engineering, and

<sup>3</sup>Department of Chemistry, Texas A&M University, College Station, Texas 77843, United States

\*e-mail: [balbuena@tamu.edu](mailto:balbuena@tamu.edu)

(a) Li/S = 0.0 with DOL @ 22.6 ps

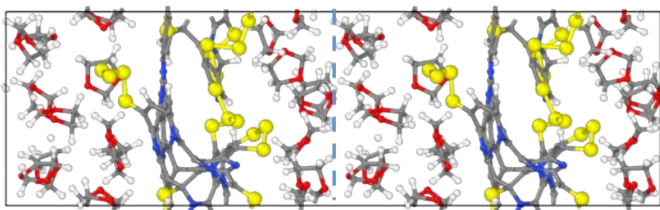

(b) Li/S = 3.0 with DOL @ 23.4 ps

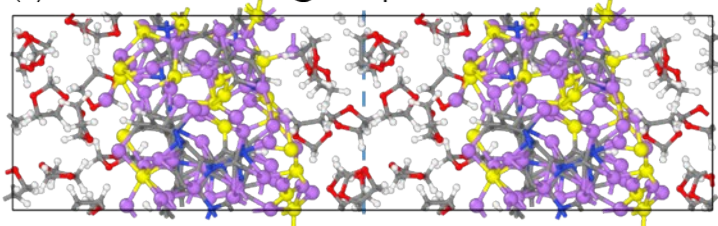

Figure S1: DOL/SPAN interfacial AIMD simulations: (a) Li/S = 0.0, (b) Li/S = 3.0. Color code for atoms as in Figure 2.

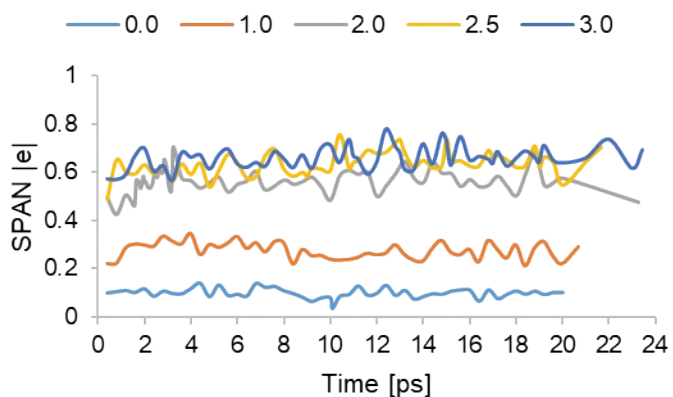

Figure S2: Time evolution of the SPAN surface electronic charge with increasing Li/S molar ratios. DOL/SPAN interfacial interaction.

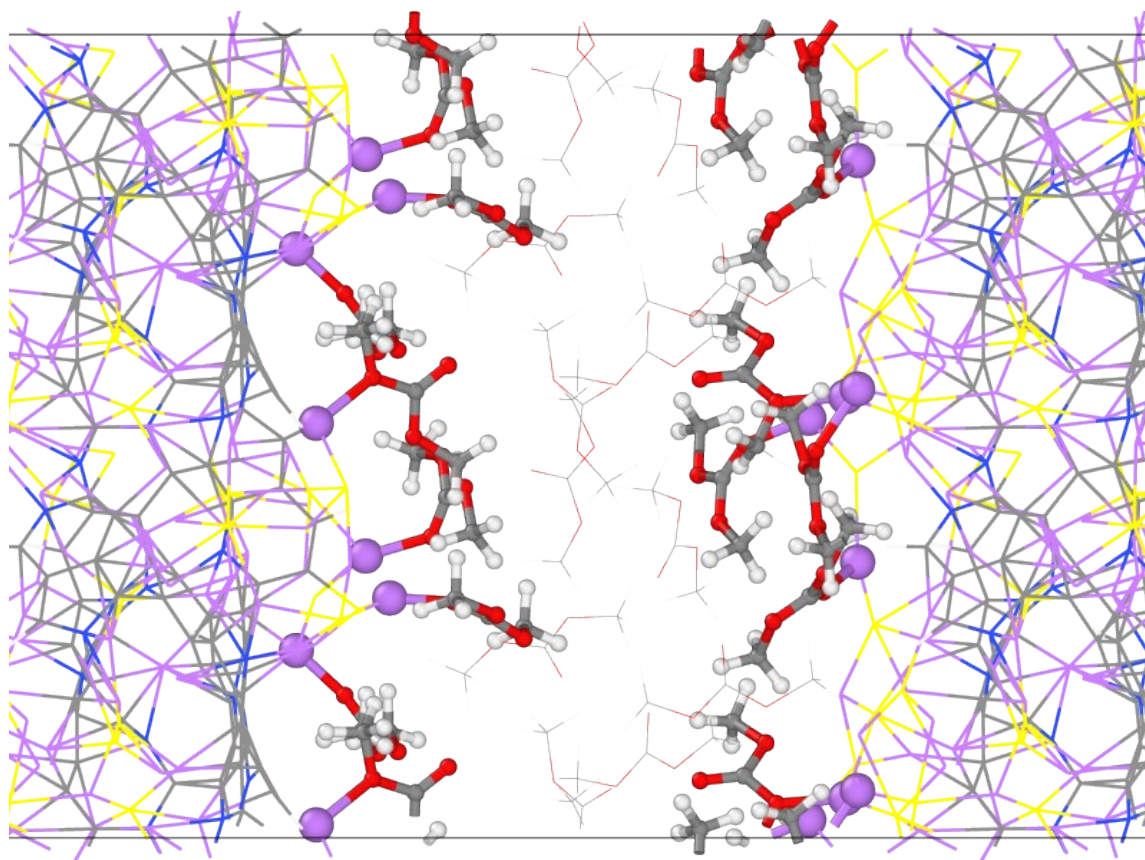

Figure S3: DMC interaction with the lithiated SPAN surface with a 3.0 Li/S molar ratio. Color code for atoms as in Figure 2.

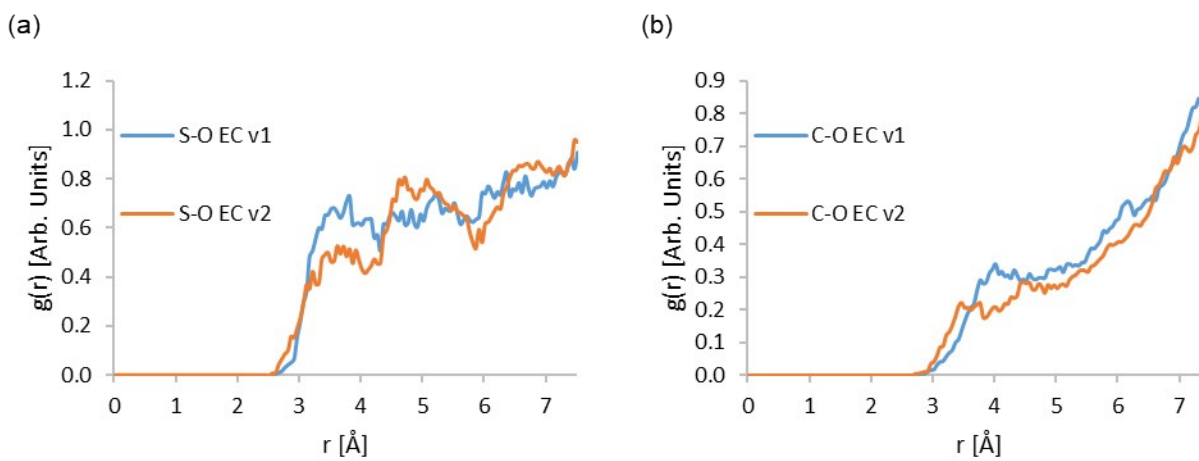

Figure S4: Partial radial distribution function (PRDF) for (a) S-O and (b) C-O and interactions for the EC interfacial interactions with the SPAN surface before lithiation.

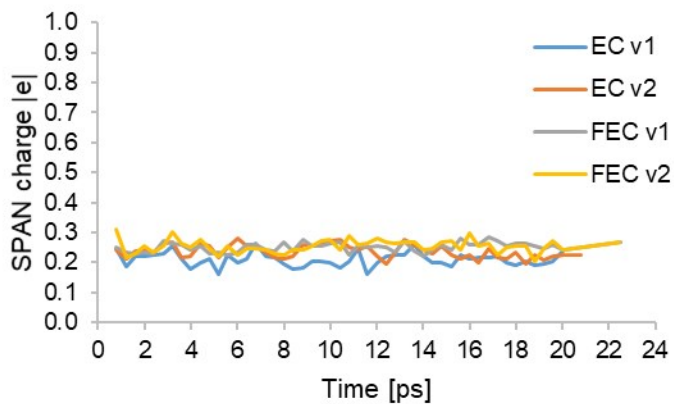

Figure S5: Time evolution for the SPAN electronic charge before lithiation: Simulations with EC and FEC.

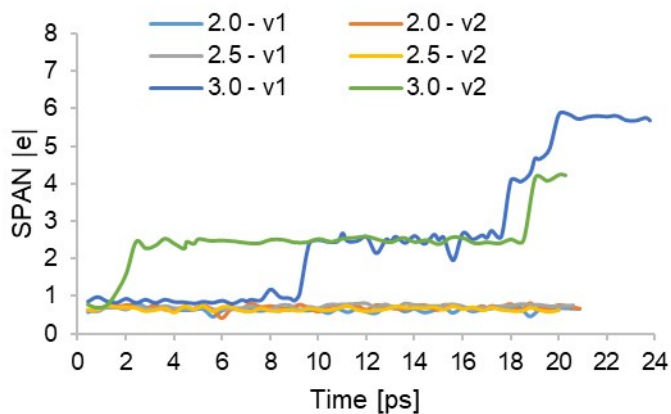

Figure S6: Surface charge time evolution for EC with increasing lithium loadings.

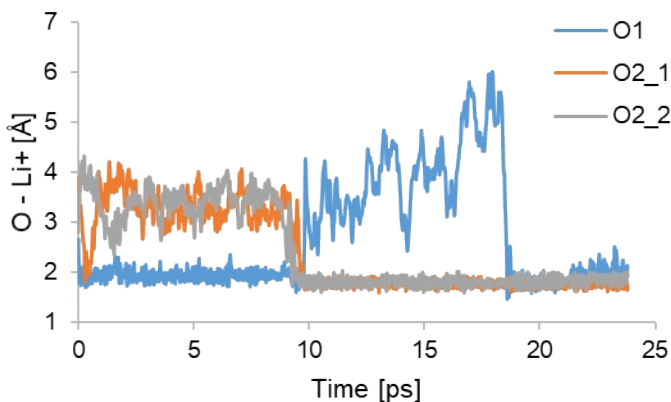

Figure S7: O-Li<sup>+</sup> distances for 4.ec molecule.

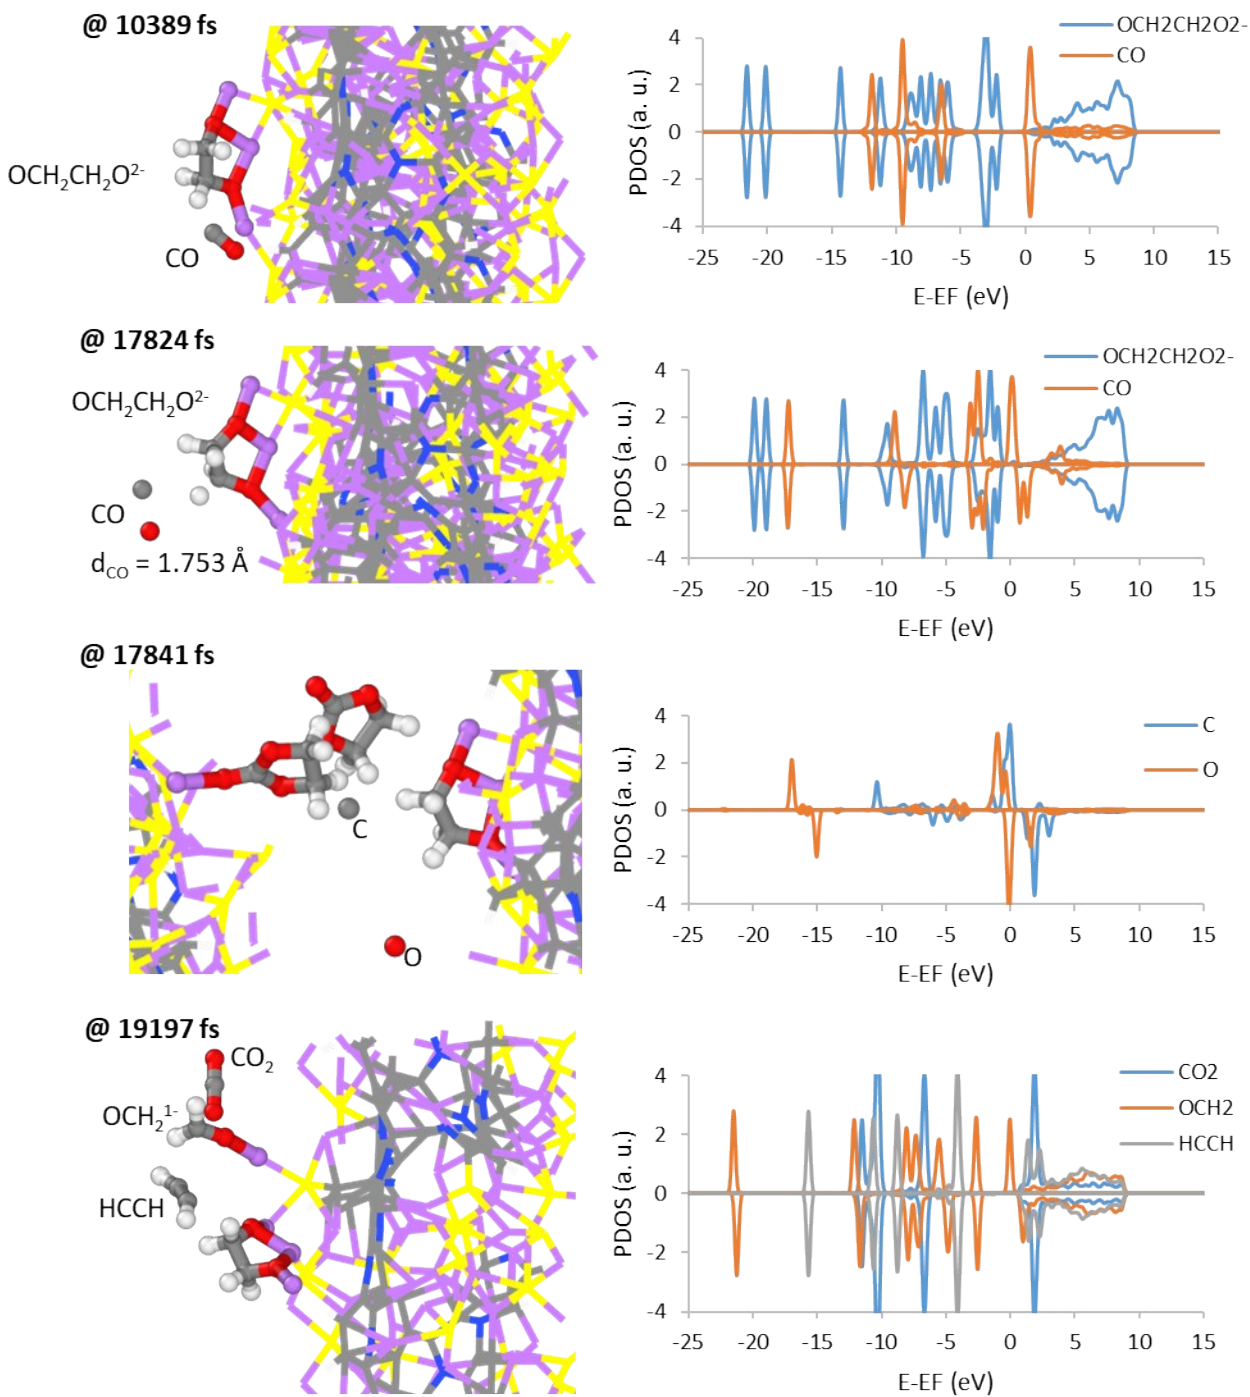

Figure S8: Projected density of states (pDOS) analysis performed on selected frames for the reaction depicted in Figure 8. Color code for atoms as in Figure 2.

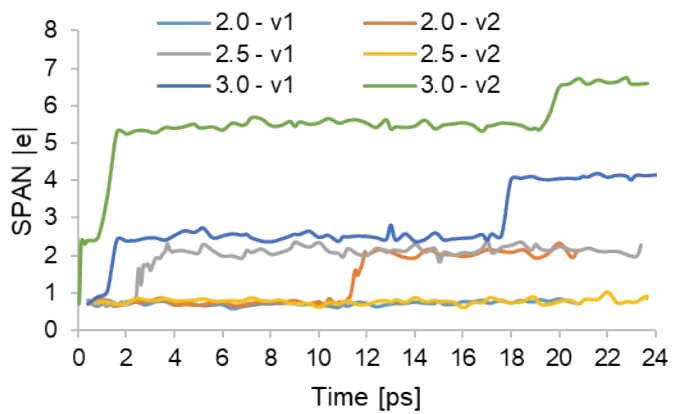

Figure S9: Surface charge time evolution for FEC with increasing lithium loadings.
